# Supplementary material for: Modular output circuits of the fastigial nucleus for diverse motor and nonmotor functions of the cerebellar vermis
Source: eLife. 2020 Jul 8;9:e58613. doi: 10.7554/eLife.58613 (PMC7438114; doi:10.7554/eLife.58613)
Supplement: Figure 3—source data 2. — Experimental parameters used in the tracing experiments, including tracers, coordinates, injection volumes, injection side (left or right), and mouse sex. These parameters were associated with 'Injection Site'. AP, ML, DV coordinates are given in mm. For the tracer injections with angled approach, AP and ML correspond with the location of craniotomy before tilting the manipulator or stage, and DV corresponds with the distance from the surface of the brain to the target in the angled setting. [file elife-58613-fig3-data2.xlsx]

## Sheet: summary
					Injection Side
	Experiment	Injection Site	N (male)	N (female)	left	right	Tracer used	AP (lambda)	ML	DV	angle	Volume	Related Figures
	Anterograde tracing: FN -> GABAergic output	FN (pan)	2	0	0	2	AAV9.CAG.FLEX.tdTomato (to Gad2Cre mice)	-2.62	0.70	2.61_2.63	0	100	Fig.3-S3
	Anterograde tracing: FN -> output	FN (F1DLP)	2	1	1	2	AAV9.hSyn.TurboRFP, BDA	-2.21_-2.46	0.89_1.01	2.31_2.57	0	20 for AAV, 100 for BDA	Fig.3-S2,4,4-S1,7
	Anterograde tracing: FN -> output	FN (F1R)	2	2	0	3	AAV9.hSyn.TurboRFP, AAV9.CAG.hChR2-mCherry, BDA	-2.02_-2.04	0.64_0.67	2.56_2.58	0	5_20 for AAVs, 100 for BDA	Fig.2-S2,3-S2,4,4-S1,7
	Anterograde tracing: FN -> output	FN (F2/F4)	6	2	2	6	AAV9.hSyn.TurboRFP, AAV9.hSyn.EGFP, BDA	-2.60_-2.79	0.60_0.71	2.42_2.63	0	5 for AAV, 60_200 for BDA	Fig.2-S2,3-S2,5,5-S1,7
	Anterograde tracing: FN -> output	FN (F3)	3	0	0	3	AAV9.hSyn.EGFP, BDA	-2.21_-2.41	0.90_0.94	2.84_2.90	0	5 for AAV, 60_100 for BDA	Fig.3-S2,4,4-S1,7
	Anterograde tracing: FN -> output	FN (pan)	6	0	2	4	AAV1.hSyn.TurboRFP, AAV9.hSyn.TurboRFP, AAV9.hSyn.EGFP	-2.62_-2.47	0.70_1.07	2.20_2.80	0	5_30	Fig.3,3-S1,3-S2,4,5
	Anterograde tracing: PC ->FN	Cerebellar cortex	4	0	2	2	AAV9.CAG.FLEX.EGFP (to L7Cre mice), AAV1.hSyn.Cre (to Ai14 mice)	na	na	na	0	20_100	Fig.7
	Disynaptic tracing: FN -> output	FN (pan)	4	5	1	7	AAV1.hSyn.Cre (to Ai14 mice)	-2.53_-2.68	0.68_0.76	2.53_2.61	0	100_200	Fig.6,6-S1
	Retrograde tracing: FN -> output	CL thal	2	2	4	0	AAV2retro.CAG.Cre (to Ai27 or Ai32 mice)	2.34_2.35	0.68_0.70	3.38_3.41	0	40_50	Fig.5-S1
	Retrograde tracing: FN -> output	IRt	2	0	1	1	Retrobeads-Green, Retrobeads-Red	-2.20	1.00	4.61	0	300	Fig.4
	Retrograde tracing: FN -> output	IVN	3	0	3	0	FastBlue, RVdG-mCherry	-2.71_-2.88	1.30	2.60_3.62	0	200	Fig.4
	Retrograde tracing: FN -> output	LDTg	2	0	2	2	Retrobeads-Red	-1.10_-1.20	(contra) 0.22	2.80_2.82 (angled)	15	100_150	Fig.5-S2
	Retrograde tracing: FN -> output	NPH	0	3	3	0	RVdG-mCherry	-2.00_-2.20	(contra) 0.25	3.73_4.04 (angled)	7	15_20	Fig.5-S2
	Retrograde tracing: FN -> output	NRG	3	0	2	1	FastbBlue, Retrobeads-Green	-2.20_-3.85	0.20_0.50	4.30_4.81	0	200_300	Fig.4
	Retrograde tracing: FN -> output	PAG	2	2	4	0	BDA, Dextran-TexasRed	0.50_1.10	0.35_1.10	2.50_3.40	0	50_80	Fig.5-S2
	Retrograde tracing: FN -> output	PF thal	5	3	4	4	BDA, Dextran-TexasRed, Retrobeads-Green, Retrobeads-Red, RVdG-mCherry	2.20_2.40	0.70	3.35_3.40	0	100_200	Fig.5-S2
	Retrograde tracing: FN -> output	SC	3	0	3	0	Retrobeads-Red, RVdG-mCherry	0.70_0.80	1.10	1.62_2.46	0	200_300	Fig.5-S2
	Retrograde tracing: FN -> output	SNc	3	0	3	0	Retrobeads-Red	1.30_1.40	1.25	4.15	0	100	Fig.5-S2
	Retrograde tracing: FN -> output	SuM	2	0	2	0	Retrobeads-Red	2.05_2.10	(contra) 0.42	4.82_4.84 (angled)	5	50_200	Fig.5-S2
	Retrograde tracing: FN -> output	VL thal	2	1	3	0	Retrobeads-Green, Retrobeads-Red	2.70_3.10	0.80_1.20	3.25_3.80	0	20_200	Fig.5
	Retrograde tracing: FN -> output	VM thal	3	0	3	0	Retrobeads-Red	2.70	0.80_0.82	4.00_4.05	0	20	Fig.5
	Retrograde tracing: FN -> output	ZI	3	0	3	0	Retrobeads-Red, RVdG-mCherry	2.35_2.50	0.70	4.38_4.54	0	100_150	Fig.5-S2
	Retrograde tracing: FN -> output	NI	0	2	2	0	AAV2retro.CAG.Cre (to Ai27), Retrobeads-red	-1.40	0.20_0.22	3.87_3.89	0	20_50	Fig.5-S2
	Retrograde tracing: IO -> PC	Cerebellar cortex	2	4	9	5	AAV1.hSyn.Cre (to Ai14 mice), Retrobeads-Green, BDA, Retrobeads-Red	na	na	na	0	20_50	Fig.7-S2
	Retrograde tracing: PC -> FN	FN (F1DLP)	2	0	1	1	BDA, Retrobeads-Red	-2.42_-2.46	1.00	2.31_2.33	0	30_50	Fig.7
	Retrograde tracing: PC -> FN	FN (F1R)	1	2	0	3	BDA	-2.02_-2.04	0.67_0.79	2.39_2.58	0	20_100	Fig.7,7-S1
	Retrograde tracing: PC -> FN	FN (F2/F4)	5	2	1	5	BDA	-2.64_-2.79	0.60_0.76	2.42_2.63	0	60_200	Fig.7
	Retrograde tracing: PC -> FN	FN (F3)	2	0	0	2	BDA, Retrobeads-Green	-2.41_-2.60	0.69_0.90	2.62_2.84	0	30_100	Fig.7-S1
	Transsynaptic tracing: FN -> output	FN (F1R/F1DLP)	0	3	0	3	AAV1.hSyn.Cre (to Ai14 mice)	-2.55_-2.57	0.76_0.79	2.37_2.40	0	80_100	Fig.4,7
	Transsynaptic tracing: FN -> output	FN (F2/F4)	2	2	0	4	AAV1.hSyn.Cre (to Ai14 mice)	-2.53_-2.60	0.70_0.76	2.51_2.60	0	100	Fig.5,7
	Transsynaptic tracing: FN -> output	FN (pan)	5	3	0	8	AAV1.hSyn.Cre (to Ai14 mice)	-2.57_-2.70	0.65_0.70	2.39_2.63	0	100_200	Fig.3,3-S2,4,5,7
	Transsynaptic tracing: FN -> output	FN (F3/F4)	2	0	1	1	AAV1.hSyn.Cre (to Ai14 mice)	-2.68	0.65_0.69	2.60_2.61	0	100_200	Fig.7
